# Supplementary figures and images for: Modeling Glioma Intratumoral Heterogeneity with Primary Human Neural Stem and Progenitor Cells
Source: PubMed Central journal article supplement — bioRxiv. 2024 Oct 22:2024.10.20.619254. Preprint. [Version 1] doi: 10.1101/2024.10.20.619254 (PMC11526988; doi:10.1101/2024.10.20.619254), 2024-10-22

A

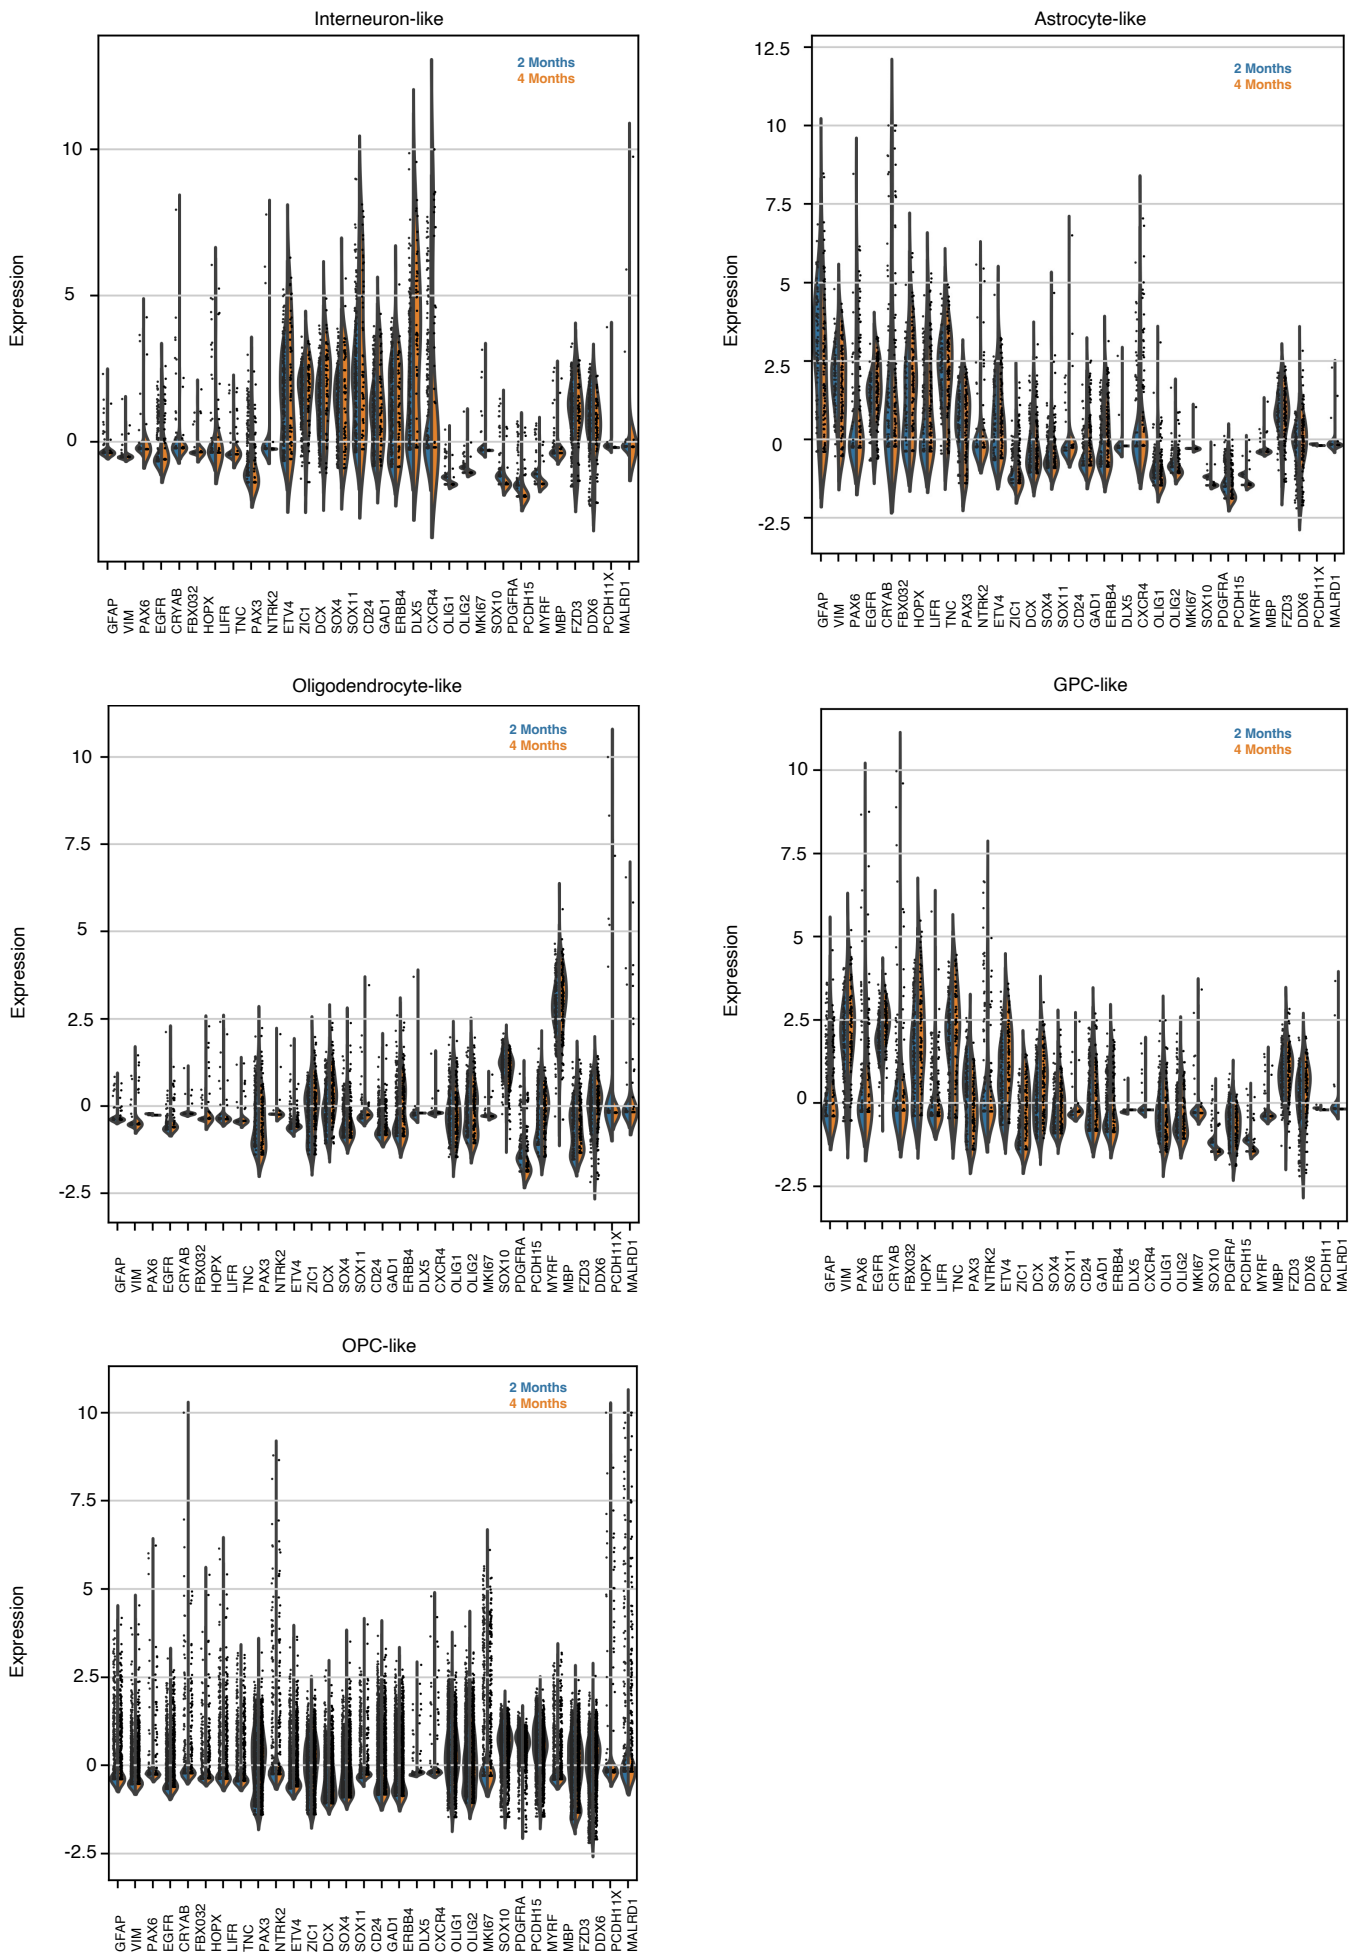

Supplementary Figure 1

Supplement: NIHPP2024.10.20.619254V1-supplement-1.pdf [file NIHPP2024.10.20.619254V1-supplement-1.pdf]
